# Supplementary material for: Modified Flory–Rehner Theory Describes Thermotropic Swelling Transition of Smart Copolymer Microgels
Source: MDPI journal article supplement (doi:10.3390/polym14101999), 2022-05-13
Supplement: s1 [file s1]

# Supplementary Materials: Modified Flory-Rehner Theory Describes Thermotropic Swelling Transition of Smart Copolymer Microgels

Simon Friesen, Sergej Kakorin and Thomas Hellweg \*

## 1. <sup>1</sup>H-NMR analysis

Quantification of the comonomer content was carried out using <sup>1</sup>H-NMR spectra. A three-fold quantification was performed. The results are listed in Table S1. For the calculation of the comonomer content in p(NNPAM-co-NIPAM) and p(NIPAM-co-NNPAM) microgels, the signal of the isopropyl H atom ( $\delta = 3.93$  ppm  $\text{NHCH}(\text{CH}_3)_2$ , 1H) and the signal of the H atoms of the secondary carbon ( $\delta = 3.14$  ppm  $\text{NHCH}_2\text{CH}_2\text{CH}_3$ , 2H) were used. From the ratios of the intensity integrals of the signals, the comonomer content was calculated. Since all signals overlap in p(NIPAM-co-NIPMAM) microgels, the signals from the H atoms of the methyl groups ( $\delta \approx 1.15$  ppm) of the homopolymer microgels p(NIPAM) and p(NIPMAM) and copolymer microgels p(NIPAM-co-NIPMAM) were normalized to the signal of the isopropyl H atom ( $\delta \approx 3.93$  ppm). Linear combination of the normalized values of the homopolymers were used to calculate the comonomer content in the copolymer microgels.

**Table S1.** Nominal comonomer content and measured comonomer content of p(NNPAM-co-NIPAM), p(NIPAM-co-NIPMAM) and p(NIPMAM-co-NNPAM). The copolymerization ratio was calculated from the <sup>1</sup>H-NMR spectra.

| nominal comonomer content / mol% | p(NNPAM-co-NIPAM) measured comonomer content / mol% | p(NIPAM-co-NIPMAM) measured comonomer content / mol% | p(NIPMAM-co-NNPAM) measured comonomer content / mol% |
|----------------------------------|-----------------------------------------------------|------------------------------------------------------|------------------------------------------------------|
| 30.0                             | 30.2                                                | 36.9                                                 | 26.2                                                 |
|                                  | 30.0                                                | 33.6                                                 | 26.2                                                 |
|                                  | 30.0                                                | 31.4                                                 | 26.5                                                 |
| 50.0                             | 55.1                                                | 51.1                                                 | 44.9                                                 |
|                                  | 54.3                                                | 50.4                                                 | 45.7                                                 |
|                                  | 53.5                                                | 50.7                                                 | 46.5                                                 |
| 70.0                             | 74.9                                                | 72.3                                                 | 69.8                                                 |
|                                  | 74.9                                                | 73.3                                                 | 70.0                                                 |
|                                  | 74.9                                                | 73.7                                                 | 70.0                                                 |

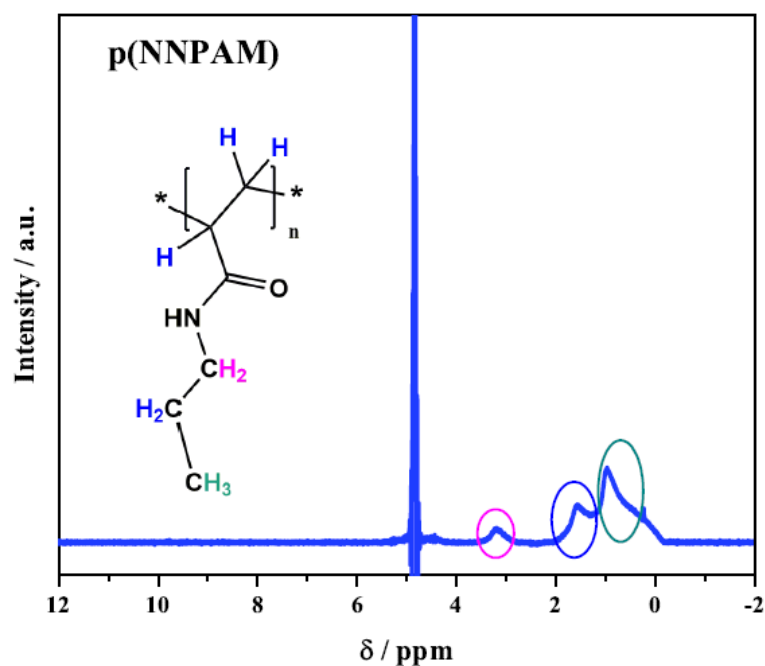

**Figure S1.**  $^1\text{H}$ -NMR spectrum of microgel p(NNPAM) and the chemical structural formula with the H atoms highlighted in color.  $\delta = 0.91$  ppm ( $\text{NHCH}_2\text{CH}_2\text{CH}_3$ , 3H) (green);  $\delta \approx 1.50$  ppm ( $\text{NHCH}_2\text{CH}_2\text{CH}_3$ , 2H) (blue);  $\delta \approx 1.50$  ppm ( $\text{CHCH}_2$ , 1H) (blue);  $\delta \approx 1.50$  ppm ( $\text{CHCH}_2$ , 2H) (blue);  $\delta = 3.14$  ppm ( $\text{NHCH}_2\text{CH}_2\text{CH}_3$ , 2H) (pink).

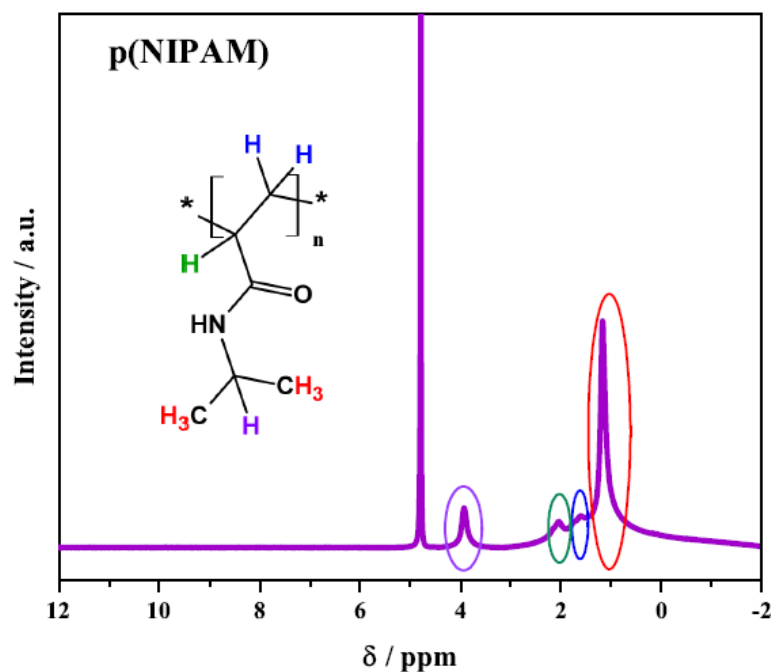

**Figure S2.**  $^1\text{H}$ -NMR spectrum of microgel p(NIPAM) and the chemical structural formula with the H atoms highlighted in color.  $\delta = 1.17$  ppm ( $\text{NHCH}(\text{CH}_3)_2$ , 6H) (red);  $\delta = 1.61$  ppm ( $\text{CHCH}_2$ , 2H) (blue);  $\delta = 2.05$  ppm ( $\text{CHCH}_2$ , 1H) (green);  $\delta = 3.93$  ppm ( $\text{NHCH}(\text{CH}_3)_2$ , 1H) (purple).

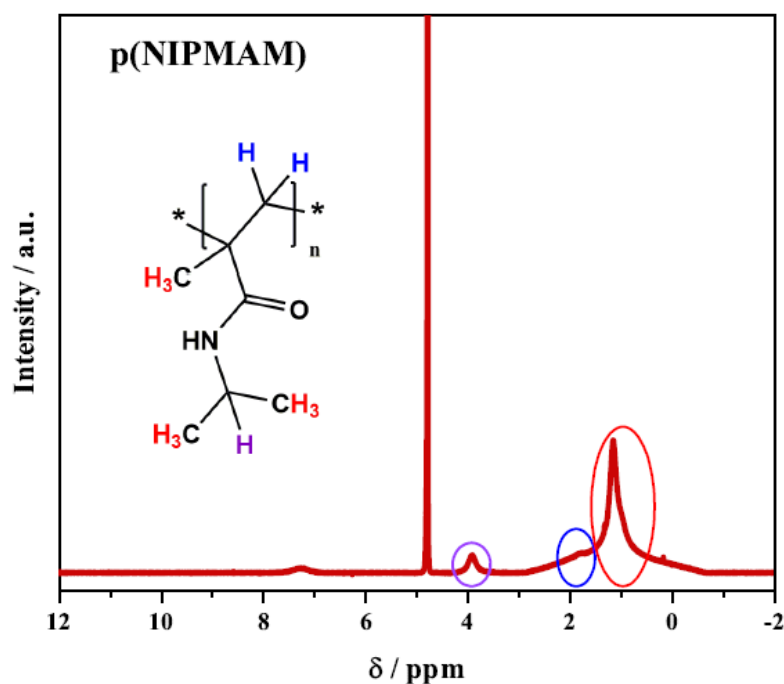

**Figure S3.**  $^1\text{H}$ -NMR spectrum of microgel p(NIPMAM) and the chemical structural formula with the H atoms highlighted in color.  $\delta \approx 1.15$  ppm (NHCH(CH<sub>3</sub>)<sub>2</sub>, 6H) (red);  $\delta \approx 1.15$  ppm (CCH<sub>3</sub>CH<sub>2</sub>, 3H) (red);  $\delta \approx 1.78$  ppm (CCH<sub>3</sub>CH<sub>2</sub>, 2H) (blue);  $\delta = 3.92$  ppm (NHCH(CH<sub>3</sub>)<sub>2</sub>, 1H) (purple).

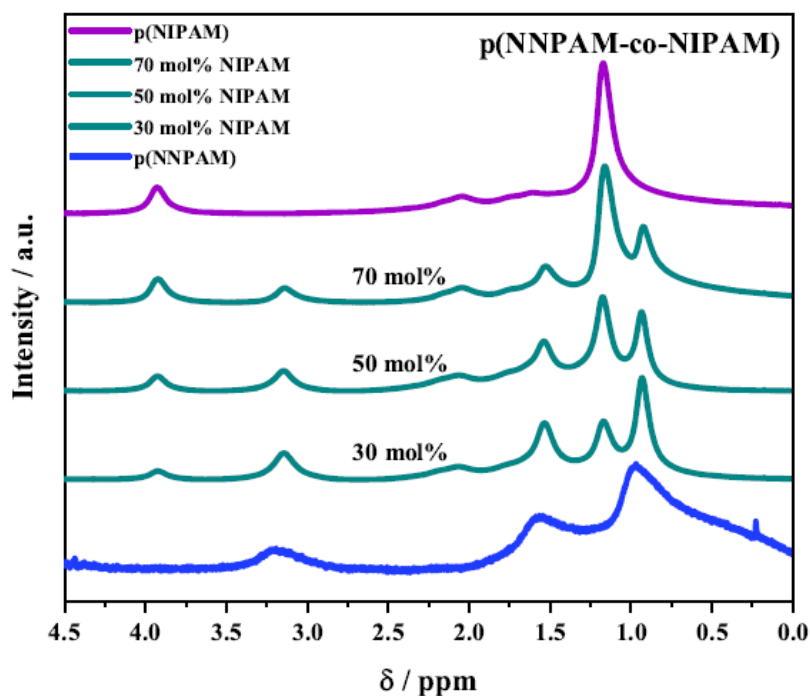

**Figure S4.**  $^1\text{H}$ -NMR spectrum of microgel p(NNPAM), p(NIPAM) and p(NNPAM-co-NIPAM) with different comonomer contents.

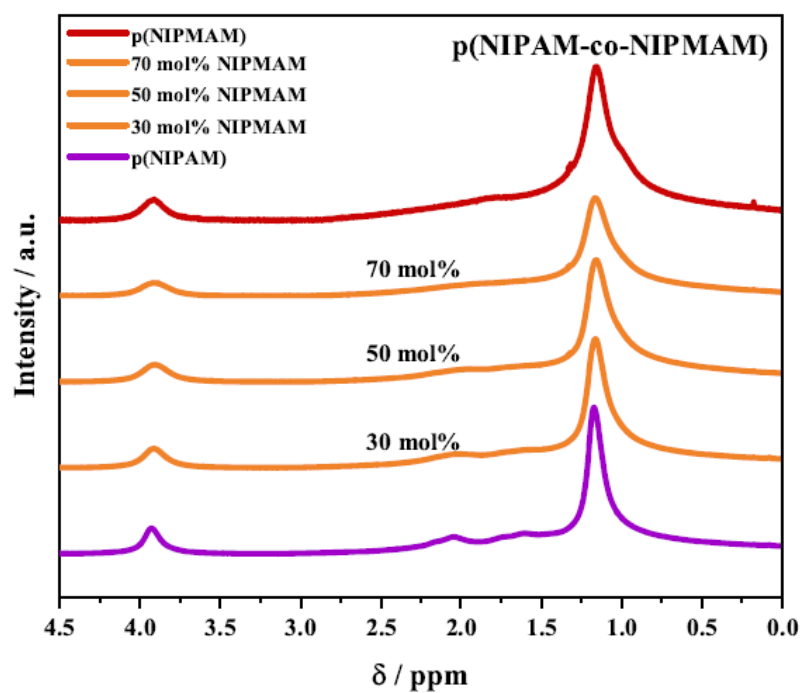

**Figure S5.**  $^1\text{H}$ -NMR spectrum of microgel p(NIPAM), p(NIPMAM) and p(NIPAM-co-NIPMAM) with different comonomer contents.

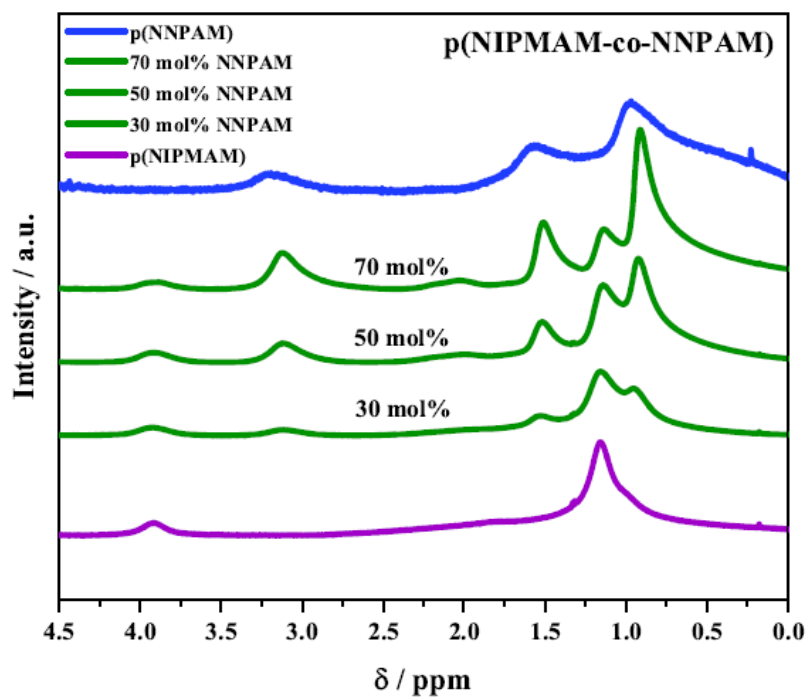

**Figure S6.**  $^1\text{H}$ -NMR spectrum of microgel p(NIPMAM), p(NNPAM) and p(NIPMAM-co-NNPAM) with different comonomer contents.
